# Supplementary material
Source: MDPI journal article supplement (https://www.mdpi.com/2076-3298/8/11/130)
Supplement: s1 [file s1]

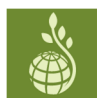

# Morphospecies Abundance of Above–Ground Invertebrates in Agricultural Systems under Glyphosate and Microplastics in South–Eastern Mexico

Edilberto Hernández–Gutiérrez <sup>1</sup>, Jaime Rendón–von Osten <sup>2</sup>, Griselda Escalona–Segura <sup>3</sup>, Jorge Mendoza–Vega <sup>1</sup>, Ricardo Dzúl–Caamal <sup>2</sup>, Sita Posthumus <sup>4</sup>, Rianne Vastenhouw <sup>4</sup>, Xiaomei Yang <sup>4</sup>, Violette Geissen <sup>4</sup> and Esperanza Huerta–Lwanga <sup>1,4,\*</sup>

Supplementary Materials:

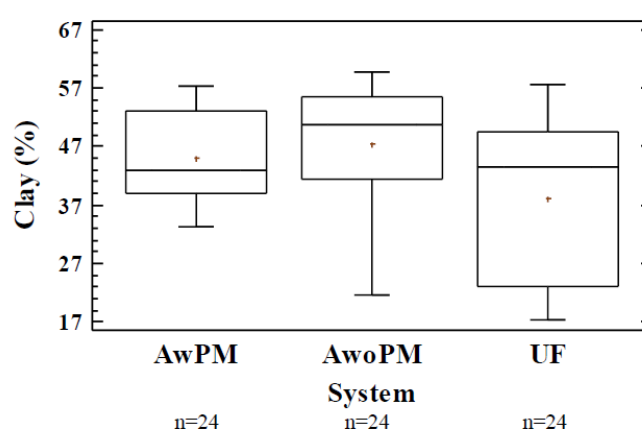

**Figure S1.** Clay percentage (%) per treatment. + = mean, middle horizontal line in the box indicates median

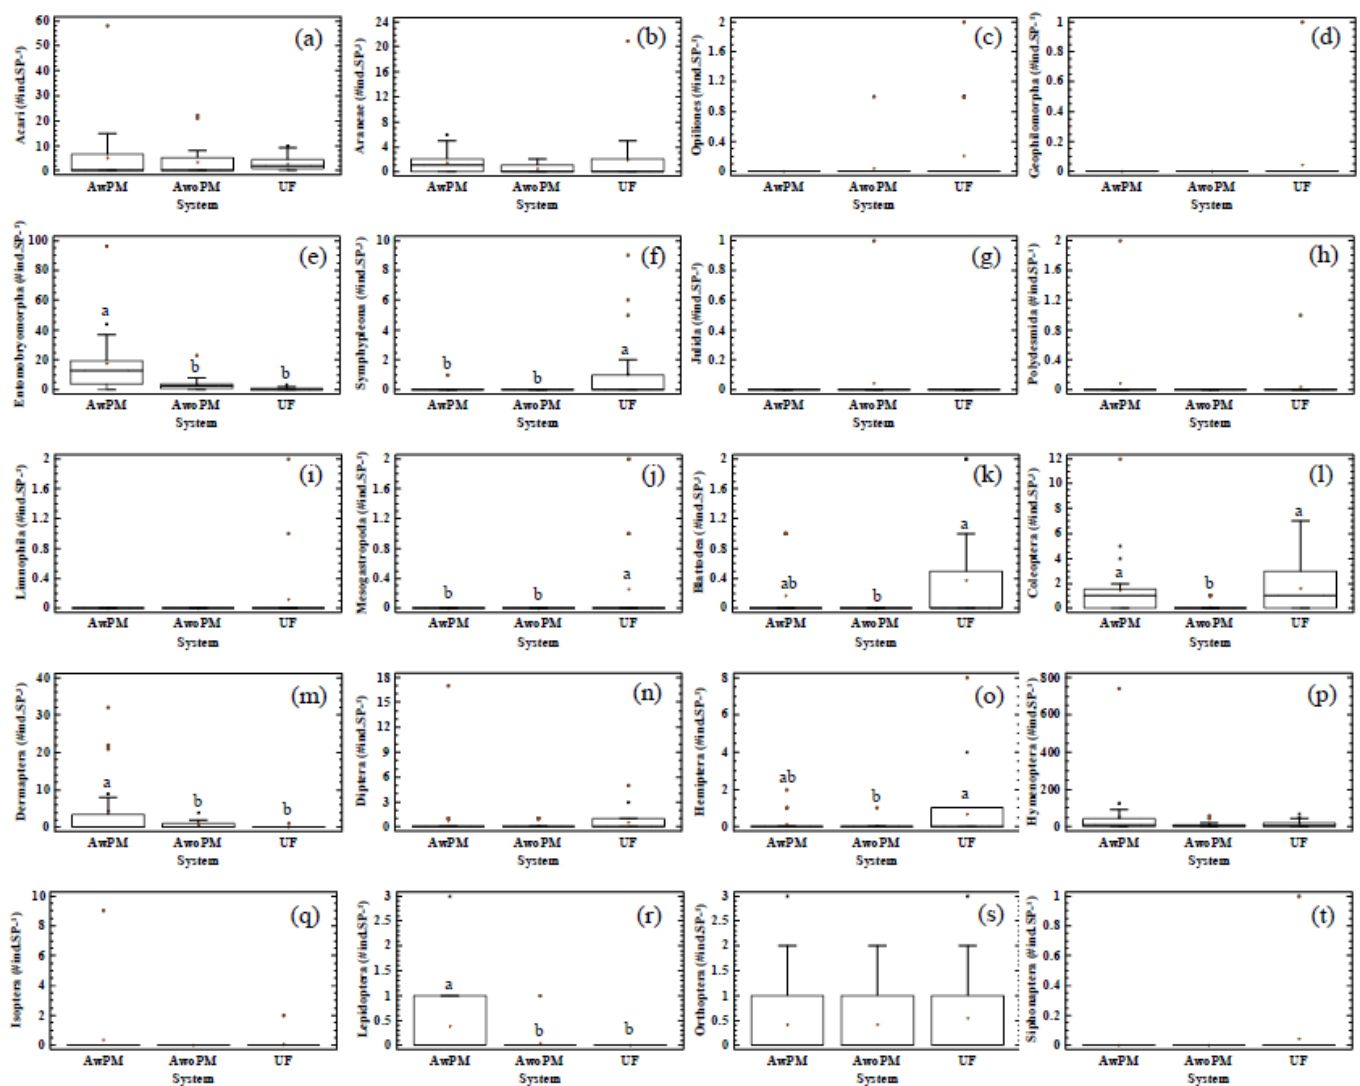

**Figure S2.** Number of individuals per sampling point (#ind SP<sup>-1</sup>) per each order. Different letters imply significantly different groups (Mann–Whitney U test,  $p < 0.05$ )

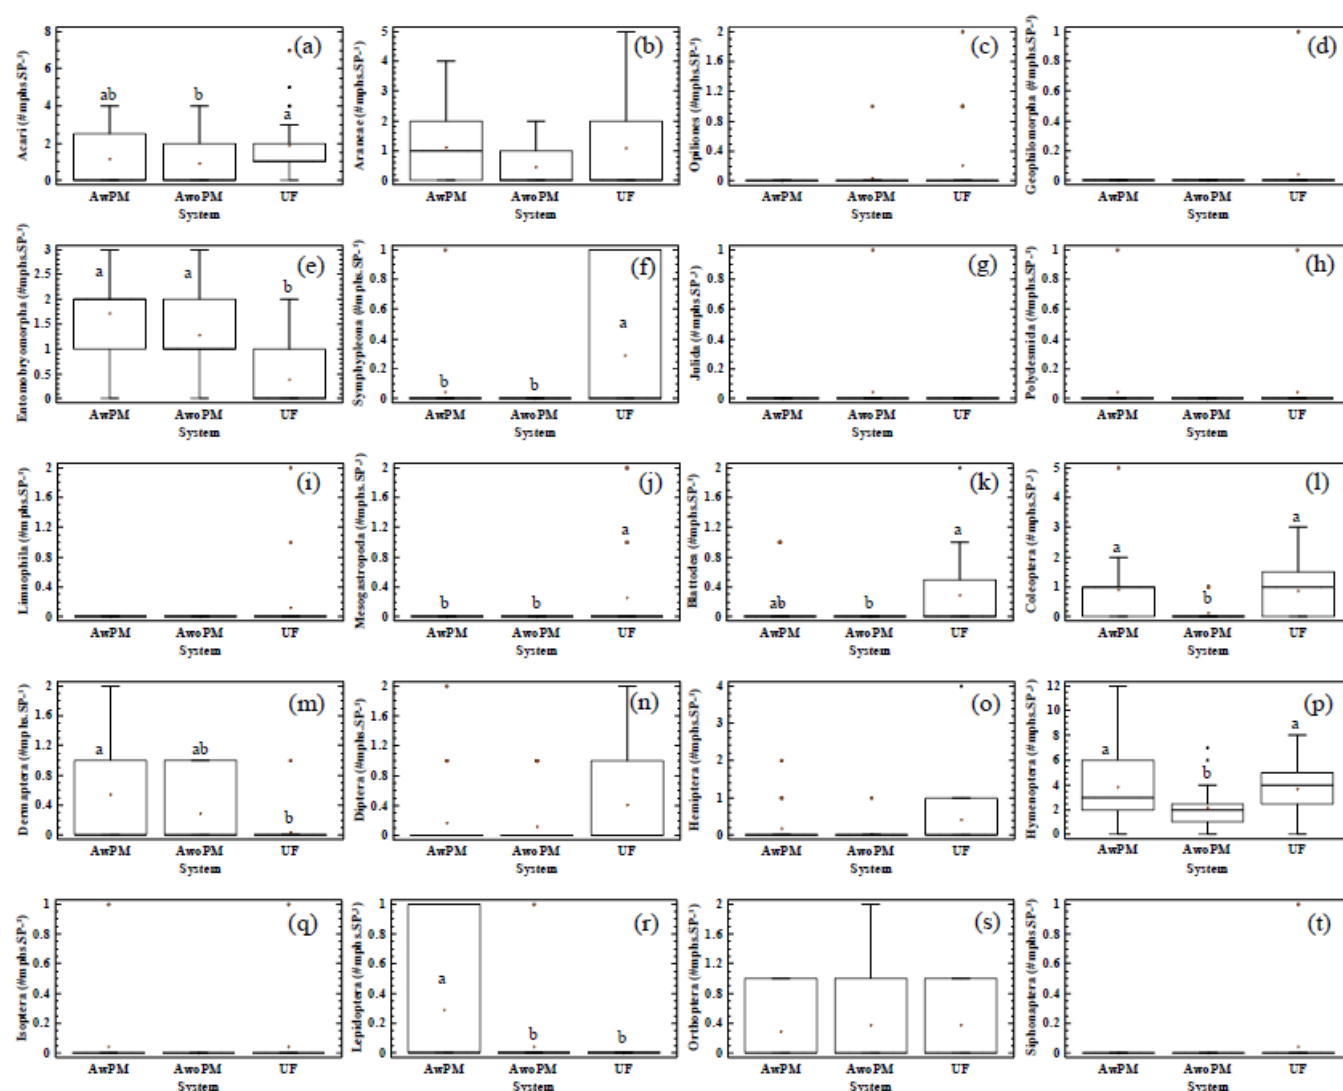

**Figure S3.** Number of morphospecies per sampling point ( $\#mphps\ SP^{-1}$ ) per each order. Different letters imply significantly different groups (Mann–Whitney U test,  $p < 0.05$ )

**Table S1.** Correlations between microplastics counts (MPs,  $n = 20$ ), soil glyphosate concentration (GLYsoil,  $n = 24$ ), soil AMPA concentration (AMPAsoil,  $n = 24$ ) and glyphosate in invertebrate tissue (GLYinv,  $n = 72$ ), number of individuals ( $\#ind$ ,  $n = 72$ ) and morphospecies ( $\#mphps$ ,  $n = 72$ ) of invertebrates and Shannon diversity index ( $H$ ,  $n = 72$ ) per sampling point.  $n$  = number of sampling points for statistical analysis.

|                                     | GLYsoil<br>( $mg\ kg\ soil^{-1}$ ) | AMPAsoil<br>( $mg\ kg\ soil^{-1}$ ) | GLYinv<br>( $mg\ kg\ tissue^{-1}$ ) | $\#ind\ SP^{-1}$ | $\#mphps\ SP^{-1}$ | $H\ SP^{-1}$  |
|-------------------------------------|------------------------------------|-------------------------------------|-------------------------------------|------------------|--------------------|---------------|
| MPs<br>(particles $kg\ soil^{-1}$ ) | −0.34                              | −0.15                               | −0.01                               | 0.37**           | −0.02              | −0.21         |
| GLYso<br>( $mg\ kg\ soil^{-1}$ )    | —                                  | <b>0.85***</b>                      | −0.73***                            | −0.10            | −0.27              | −0.14         |
| AMPAso<br>( $mg\ kg\ soil^{-1}$ )   | —                                  | —                                   | −0.59**                             | −0.26            | −0.27              | −0.03         |
| GLYinv<br>( $mg\ kg\ tissue^{-1}$ ) | —                                  | —                                   | —                                   | −0.13            | <b>−0.25*</b>      | 0.01          |
| $\#ind\ SP^{-1}$                    | —                                  | —                                   | —                                   | —                | <b>0.66***</b>     | −0.04         |
| $\#mphps\ SP^{-1}$                  | —                                  | —                                   | —                                   | —                | —                  | <b>0.38**</b> |

$\#ind$  = number of individuals,  $\#mphps$  = number of morphospecies,  $H$  = Shannon diversity index,  $SP$  = sampling point, bold = indicates statistically significant value, \* $P < 0.05$ , \*\* $P < 0.01$ , \*\*\* $P < 0.001$ .

**Table S2.** Number of morphospecies at each classification level.

| Phylum     | Subphylum   | Class      | Subclass      | Order            | Suborder       | Superfamily   | Family            | Subfamily      | Genus       | #mps |
|------------|-------------|------------|---------------|------------------|----------------|---------------|-------------------|----------------|-------------|------|
| Arthropoda | Chelicerata | Arachnida  |               | Acari            |                |               |                   |                |             | 26   |
|            |             |            |               | Araneae          |                |               |                   |                |             | 24   |
|            |             |            |               | Opiliones        |                |               |                   |                |             | 4    |
|            | Hexapoda    | Collembola |               | Entomobryomorpha |                | Entomobryodea | Actaletidae       |                |             | 1    |
|            |             |            |               |                  |                |               | Entomobryidae     |                |             | 1    |
|            |             |            |               |                  |                |               | Tomoceridae       |                |             | 1    |
|            |             |            |               |                  |                |               | ND                |                |             | 1    |
|            |             |            |               |                  |                |               |                   |                |             |      |
|            |             | Insecta    | Pterygota     | Symphyleona      |                | Sminthuroidea | Sminthuridae      | Sphyrothecinae |             | 1    |
|            |             |            |               | Blattodea        |                |               |                   |                |             | 7    |
|            |             |            |               | Coleoptera       |                |               | Carabidae         |                |             | 6    |
|            |             |            |               |                  |                |               | Chrysomelidae     |                |             | 4    |
|            |             |            |               |                  |                |               | Coccinellidae     |                |             | 3    |
|            |             |            |               |                  |                |               | Cucujidae         |                |             | 4    |
|            |             |            |               |                  |                |               | Elateridae        |                |             | 1    |
|            |             |            |               |                  |                |               |                   |                |             | 2    |
|            |             |            |               | Dermaptera       |                |               |                   |                |             | 2    |
|            |             |            |               | Diptera          |                |               |                   |                |             | 9    |
|            |             |            |               | Hemiptera        | Heteroptera    |               |                   |                |             | 3    |
|            |             |            |               |                  | Sternorrhyncha |               |                   |                |             |      |
|            |             |            |               | Hymenoptera      |                | Aphididae     |                   |                |             | 6    |
|            |             |            |               |                  |                |               | Aphelinidae       |                |             | 2    |
|            |             |            |               |                  |                |               | Braconidae        |                |             | 1    |
|            |             |            |               |                  |                |               | Formicidae        |                |             | 30   |
|            |             |            |               |                  |                |               | Ichneumonidae     |                |             | 3    |
|            |             |            |               |                  |                |               | Trichogrammatidae |                |             | 3    |
|            |             |            |               |                  |                |               | Vespidae          |                |             | 1    |
|            |             |            |               | Isoptera         |                |               |                   |                |             | 1    |
|            |             |            |               | Lepidoptera      |                |               |                   |                |             | 4    |
|            |             |            |               | Orthoptera       |                |               |                   |                |             | 11   |
|            |             |            |               | Siphonaptera     |                |               |                   |                |             | 1    |
|            | Myriapoda   | Chilopoda  |               | Geophilomorpha   |                |               |                   |                |             | 1    |
|            |             | Diplopoda  | Chilognatha   | Julida           |                |               |                   |                |             | 1    |
|            |             |            |               | Polydesmida      |                |               |                   |                |             | 1    |
| Mollusca   |             | Gastropoda | Prosobranchia | Mesogastropoda   |                |               | Hydrobiidae       |                | Cochliopina | 2    |
|            |             |            | Pulmonata     | Limnophila       |                |               | Limnaeidae        |                | Fossaria    | 1    |
|            |             |            |               |                  |                |               |                   |                | Stagnicola  | 1    |
|            |             |            |               |                  |                |               | Planorbidae       |                | Biophlaria  | 1    |

#mps = number of morphospecies, ND = no defined.

**Table S3.** Correlations between soil microplastics (MPs,  $n = 66$ ), soil glyphosate concentration (GLYsoil,  $n = 24$ ), soil AMPA concentration (AMPAsoil,  $n = 24$ ) and glyphosate in invertebrate tissue (GLYinv,  $n = 72$ ) with the number of individuals per sampling point per order.

|                                           | Arachnida                         |                                     |                                       | Chilopoda                                  | Collembola                                   |                                         | Diplopoda                          |                                         | Gastropoda                             |                                            |
|-------------------------------------------|-----------------------------------|-------------------------------------|---------------------------------------|--------------------------------------------|----------------------------------------------|-----------------------------------------|------------------------------------|-----------------------------------------|----------------------------------------|--------------------------------------------|
|                                           | Acari<br>(#ind SP <sup>-1</sup> ) | Araneae<br>(#ind SP <sup>-1</sup> ) | Opiliones<br>(#ind SP <sup>-1</sup> ) | Geophilomorpha<br>(#ind SP <sup>-1</sup> ) | Entomobryomorpha<br>(#ind SP <sup>-1</sup> ) | Symphyleona<br>(#ind SP <sup>-1</sup> ) | Julida<br>(#ind SP <sup>-1</sup> ) | Polydesmida<br>(#ind SP <sup>-1</sup> ) | Limnophila<br>(#ind SP <sup>-1</sup> ) | Mesogastropoda<br>(#ind SP <sup>-1</sup> ) |
| MPs<br>(particles kg soil <sup>-1</sup> ) | -0.06                             | 0.11                                | -0.12                                 | -0.17                                      | <b>0.61***</b>                               | <b>-0.29*</b>                           | -0.17                              | 0.05                                    | -0.24                                  | <b>-0.34**</b>                             |
| GLYslo<br>(mg kg soil <sup>-1</sup> )     | 0.37                              | -0.05                               | 0.12                                  | ND                                         | -0.41                                        | ND                                      | 0.23                               | ND                                      | ND                                     | ND                                         |
| AMPA slo                                  | 0.33                              | -0.14                               | 0.20                                  | ND                                         | -0.21                                        | ND                                      | 0.02                               | ND                                      | ND                                     | ND                                         |

|                                                                      |                                       |                                        |                                        |                                     |                                       |                                          |                                      |                                         |                                        |                                          |
|----------------------------------------------------------------------|---------------------------------------|----------------------------------------|----------------------------------------|-------------------------------------|---------------------------------------|------------------------------------------|--------------------------------------|-----------------------------------------|----------------------------------------|------------------------------------------|
| (mg kg soil <sup>-1</sup> )<br>GLYinv<br>(mg kg soil <sup>-1</sup> ) | −0.16                                 | −0.22                                  | −0.02                                  | −0.04                               | 0.06                                  | −0.12                                    | −0.04                                | −0.06                                   | −0.06                                  | −0.08                                    |
|                                                                      | Insecta                               |                                        |                                        |                                     |                                       |                                          |                                      |                                         |                                        |                                          |
|                                                                      | Blattodea<br>(#ind SP <sup>-1</sup> ) | Coleoptera<br>(#ind SP <sup>-1</sup> ) | Dermoptera<br>(#ind SP <sup>-1</sup> ) | Diptera<br>(#ind SP <sup>-1</sup> ) | Hemiptera<br>(#ind SP <sup>-1</sup> ) | Hymenoptera.<br>(#ind SP <sup>-1</sup> ) | Isoptera<br>(#ind SP <sup>-1</sup> ) | Lepidoptera<br>(#ind SP <sup>-1</sup> ) | Orthoptera<br>(#ind SP <sup>-1</sup> ) | Siphonaptera<br>(#ind SP <sup>-1</sup> ) |
| MPs<br>(particles kg soil <sup>-1</sup> )                            | −0.12                                 | 0.01                                   | <b>0.41***</b>                         | −0.20                               | −0.14                                 | 0.06                                     | −0.02                                | <b>0.36**</b>                           | −0.07                                  | −0.07                                    |
| GLYslo<br>(mg kg soil <sup>-1</sup> )                                | ND                                    | 0.03                                   | 0.16                                   | −0.26                               | 0.20                                  | −0.04                                    | ND                                   | −0.17                                   | −0.23                                  | ND                                       |
| AMPAslo<br>(mg kg soil <sup>-1</sup> )                               | ND                                    | 0.32                                   | −0.12                                  | −0.25                               | 0.26                                  | −0.15                                    | ND                                   | −0.23                                   | −0.25                                  | ND                                       |
| GLYinv<br>(mg kg soil <sup>-1</sup> )                                | −0.14                                 | <b>−0.35**</b>                         | 0.06                                   | −0.13                               | −0.15                                 | 0.02                                     | −0.06                                | −0.04                                   | 0.10                                   | −0.04                                    |

SP = sampling point, ND = no defined, bold = indicates statistically significant value, \*P < 0.05, \*\*P < 0.01, \*\*\*P < 0.001.

**Table S4.** Correlations between soil microplastics count (MPs,  $n = 66$ ), soil glyphosate concentration (GLYsoil,  $n = 24$ ), soil AMPA concentration (AMPAsoil,  $n = 24$ ) and glyphosate in invertebrate tissue (GLYinv,  $n = 72$ ) with the number of morphospecies per sampling point per order.  $n$  = number of sampling points for statistical analysis.

|                                           |                                         |                                          |                                          |                                             |                                                |                                           |                                        |                                           |                                          |                                              |
|-------------------------------------------|-----------------------------------------|------------------------------------------|------------------------------------------|---------------------------------------------|------------------------------------------------|-------------------------------------------|----------------------------------------|-------------------------------------------|------------------------------------------|----------------------------------------------|
|                                           | Arachnida                               |                                          |                                          | Chilopoda                                   | Collembola                                     |                                           | Diplopoda                              |                                           | Gastropoda                               |                                              |
|                                           | Acari<br>(#mphis SP <sup>-1</sup> )     | Araneae<br>(#mphis SP <sup>-1</sup> )    | Opiliones<br>(#mphis SP <sup>-1</sup> )  | Geophilomorph<br>(#mphis SP <sup>-1</sup> ) | Entomobryomorpha<br>(#mphis SP <sup>-1</sup> ) | Symphyleona<br>(#mphis SP <sup>-1</sup> ) | Julida<br>(#mphis SP <sup>-1</sup> )   | Polydesmida<br>(#mphis SP <sup>-1</sup> ) | Limnophila<br>(#mphis SP <sup>-1</sup> ) | Mesogastropoda<br>(#mphis SP <sup>-1</sup> ) |
| MPs<br>(particles kg soil <sup>-1</sup> ) | −0.16                                   | 0.09                                     | −0.12                                    | −0.17                                       | <b>0.41***</b>                                 | <b>−0.29*</b>                             | −0.17                                  | 0.05                                      | −0.24                                    | <b>−0.34**</b>                               |
| GLYslo<br>(mg kg soil <sup>-1</sup> )     | 0.27                                    | −0.05                                    | 0.11                                     | ND                                          | <b>−0.44*</b>                                  | ND                                        | ND                                     | ND                                        | ND                                       | ND                                           |
| AMPAslo<br>(mg kg soil <sup>-1</sup> )    | 0.25                                    | −0.14                                    | 0.20                                     | ND                                          | −0.33                                          | ND                                        | ND                                     | ND                                        | ND                                       | ND                                           |
| GLYinv<br>(mg kg soil <sup>-1</sup> )     | −0.19                                   | −0.22                                    | −0.02                                    | −0.04                                       | 0.20                                           | −0.12                                     | −0.04                                  | −0.06                                     | −0.06                                    | −0.08                                        |
|                                           | Insecta                                 |                                          |                                          |                                             |                                                |                                           |                                        |                                           |                                          |                                              |
|                                           | Blattodea<br>(#mphis SP <sup>-1</sup> ) | Coleoptera<br>(#mphis SP <sup>-1</sup> ) | Dermoptera<br>(#mphis SP <sup>-1</sup> ) | Diptera<br>(#mphis SP <sup>-1</sup> )       | Hemiptera<br>(#mphis SP <sup>-1</sup> )        | Hymenoptera<br>(#mphis SP <sup>-1</sup> ) | Isoptera<br>(#mphis SP <sup>-1</sup> ) | Lepidoptera<br>(#mphis SP <sup>-1</sup> ) | Orthoptera<br>(#mphis SP <sup>-1</sup> ) | Siphonaptera<br>(#mphis SP <sup>-1</sup> )   |
| MPs<br>(particles kg soil <sup>-1</sup> ) | −0.12                                   | 0.07                                     | <b>0.39**</b>                            | −0.20                                       | −0.13                                          | −0.04                                     | −0.02                                  | <b>0.36**</b>                             | −0.07                                    | −0.07                                        |
| GLYslo<br>(mg kg soil <sup>-1</sup> )     | ND                                      | 0.03                                     | 0.13                                     | −0.26                                       | 0.20                                           | −0.10                                     | ND                                     | −0.17                                     | −0.25                                    | ND                                           |
| AMPAslo<br>(mg kg soil <sup>-1</sup> )    | ND                                      | 0.32                                     | −0.14                                    | −0.25                                       | 0.26                                           | −0.06                                     | ND                                     | −0.23                                     | −0.24                                    | ND                                           |
| GLYinv<br>(mg kg soil <sup>-1</sup> )     | −0.14                                   | <b>−0.32**</b>                           | 0.08                                     | −0.13                                       | −0.15                                          | −0.12                                     | −0.06                                  | −0.04                                     | 0.11                                     | −0.04                                        |

SP = sampling point, ND = no defined, bold = indicates statistically significant value, \*P < 0.05, \*\*P < 0.01, \*\*\*P < 0.001.

**Table S5.** Correlations between global abundance and global diversity with relative abundance by order of above ground invertebrates ( $n = 72$ ).  $n$  = number of sampling points for statistical analysis.

|                                            | #ind SP <sup>-1</sup> | H SP <sup>-1</sup> |                                        | #inds SP <sup>-1</sup> | H SP <sup>-1</sup> |
|--------------------------------------------|-----------------------|--------------------|----------------------------------------|------------------------|--------------------|
| <b>Arachnida</b>                           |                       |                    | <b>Insecta</b>                         |                        |                    |
| Acar (#mphs SP <sup>-1</sup> )             | 0.18                  | 0.04               | Blattodea (#mphs SP <sup>-1</sup> )    | 0.20                   | 0.11               |
| Araneae (#mphs SP <sup>-1</sup> )          | <b>0.41**</b>         | <b>0.26*</b>       | Coleoptera (#mphs SP <sup>-1</sup> )   | 0.23                   | <b>0.25</b>        |
| Opiliones (#mphs SP <sup>-1</sup> )        | 0.05                  | 0.11               | Dermaptera (#mphs SP <sup>-1</sup> )   | <b>0.30</b>            | <b>-0.33</b>       |
| <b>Chilopoda</b>                           |                       |                    | Diptera (#mphs SP <sup>-1</sup> )      | 0.06                   | -0.04              |
| Geophilomorpha (#mphs SP <sup>-1</sup> )   | 0.13                  | 0.09               | Hemiptera (#mphs SP <sup>-1</sup> )    | 0.06                   | 0.15               |
| <b>Collembola</b>                          |                       |                    | Hymenoptera (#mphs SP <sup>-1</sup> )  | <b>0.64***</b>         | 0.11               |
| Entomobryomorpha (#mphs SP <sup>-1</sup> ) | <b>0.38**</b>         | -0.06              | Isoptera (#mphs SP <sup>-1</sup> )     | 0.19                   | <b>0.25*</b>       |
| Symphyleona (#mphs SP <sup>-1</sup> )      | 0.20                  | 0.09               | Lepidoptera (#mphs SP <sup>-1</sup> )  | <b>0.34**</b>          | -0.05              |
| <b>Diplopoda</b>                           |                       |                    | Orthoptera (#mphs SP <sup>-1</sup> )   | <b>0.34**</b>          | -0.09              |
| Julida (#mphs SP <sup>-1</sup> )           | -0.12                 | -0.07              | Siphonaptera (#mphs SP <sup>-1</sup> ) | -0.07                  | 0.20               |
| Polydesmida (#mphs SP <sup>-1</sup> )      | 0.03                  | 0.12               |                                        |                        |                    |
| <b>Gastropoda</b>                          |                       |                    |                                        |                        |                    |
| Limnophila (#mphs SP <sup>-1</sup> )       | -0.06                 | 0.21               |                                        |                        |                    |
| Mesogastropoda (#mphs SP <sup>-1</sup> )   | -0.18                 | 0.12               |                                        |                        |                    |

#mphs = number of morphospecies, H = Shannon diversity index, SP = sampling point, bold = indicates statistically significant value, \* $P < 0.05$ , \*\* $P < 0.01$ , \*\*\* $P < 0.001$ .

**Table S6.** Correlations between global richness and global diversity with relative richness by order of above ground invertebrates ( $n = 72$ ).  $n$  = number of sampling points for statistical analysis.

|                                            | #mphs SP <sup>-1</sup> | H SP <sup>-1</sup> |                                        | #mphs SP <sup>-1</sup> | H SP <sup>-1</sup> |
|--------------------------------------------|------------------------|--------------------|----------------------------------------|------------------------|--------------------|
| <b>Arachnida</b>                           |                        |                    | <b>Insecta</b>                         |                        |                    |
| Acar (#mphs SP <sup>-1</sup> )             | <b>0.33**</b>          | 0.17               | Blattodea (#mphs SP <sup>-1</sup> )    | 0.23                   | 0.11               |
| Araneae (#mphs SP <sup>-1</sup> )          | <b>0.59***</b>         | <b>0.29</b>        | Coleoptera (#mphs SP <sup>-1</sup> )   | <b>0.53***</b>         | <b>0.25*</b>       |
| Opiliones (#mphs SP <sup>-1</sup> )        | 0.09                   | 0.11               | Dermaptera (#mphs SP <sup>-1</sup> )   | <0.01                  | <b>-0.34**</b>     |
| <b>Chilopoda</b>                           |                        |                    | Diptera (#mphs SP <sup>-1</sup> )      | 0.08                   | -0.04              |
| Geophilomorpha (#mphs SP <sup>-1</sup> )   | 0.20                   | 0.09               | Hemiptera (#mphs SP <sup>-1</sup> )    | 0.23                   | 0.15               |
| <b>Collembola</b>                          |                        |                    | Hymenoptera (#mphs SP <sup>-1</sup> )  | <b>0.70***</b>         | <b>0.32**</b>      |
| Entomobryomorpha (#mphs SP <sup>-1</sup> ) | 0.08                   | -0.10              | Isoptera (#mphs SP <sup>-1</sup> )     | <b>0.25*</b>           | <b>0.25*</b>       |
| Symphyleona (#mphs SP <sup>-1</sup> )      | <b>0.33**</b>          | 0.09               | Lepidoptera (#mphs SP <sup>-1</sup> )  | <b>0.35**</b>          | -0.06              |
| <b>Diplopoda</b>                           |                        |                    | Orthoptera (#mphs SP <sup>-1</sup> )   | <b>0.25*</b>           | -0.06              |
| Julida (#mphs SP <sup>-1</sup> )           | 0.05                   | -0.07              | Siphonaptera (#mphs SP <sup>-1</sup> ) | 0.14                   | 0.20               |
| Polydesmida (#mphs SP <sup>-1</sup> )      | 0.09                   | 0.12               |                                        |                        |                    |
| <b>Gastropoda</b>                          |                        |                    |                                        |                        |                    |
| Limnophila (#mphs SP <sup>-1</sup> )       | 0.15                   | 0.21               |                                        |                        |                    |
| Mesogastropoda (#mphs SP <sup>-1</sup> )   | 0.04                   | 0.12               |                                        |                        |                    |

#mphs = number of morphospecies, H = Shannon diversity index, SP = sampling point, bold = indicates statistically significant value, \*P < 0.05, \*\*P < 0.01, \*\*\*P < 0.001.

**Table S7.** Correlation between number of individuals per sampling point (#ind.SP<sup>-1</sup>) per orders of soil invertebrates (*n* = 72). *n* = number of sampling points for statistical analysis.

|                                            | Arachnida                        |                                     |                                       | Chilopoda                                  | Collembola                                   |                                         | Diplopoda                          |                                         | Gastropoda                             |                                            |
|--------------------------------------------|----------------------------------|-------------------------------------|---------------------------------------|--------------------------------------------|----------------------------------------------|-----------------------------------------|------------------------------------|-----------------------------------------|----------------------------------------|--------------------------------------------|
|                                            | Acar<br>(#ind SP <sup>-1</sup> ) | Araneae<br>(#ind SP <sup>-1</sup> ) | Opiliones<br>(#ind SP <sup>-1</sup> ) | Geophilomorpha<br>(#ind SP <sup>-1</sup> ) | Entomobryomorpha<br>(#ind SP <sup>-1</sup> ) | Symphyleona<br>(#ind SP <sup>-1</sup> ) | Julida<br>(#ind SP <sup>-1</sup> ) | Polydesmida<br>(#ind SP <sup>-1</sup> ) | Limnophila<br>(#ind SP <sup>-1</sup> ) | Mesogastropoda<br>(#ind SP <sup>-1</sup> ) |
| <b>Arachnida</b>                           |                                  |                                     |                                       |                                            |                                              |                                         |                                    |                                         |                                        |                                            |
| Acar (#mphs SP <sup>-1</sup> )             |                                  | −0.07                               | −0.06                                 | 0.12                                       | 0.07                                         | 0.18                                    | 0.04                               | −0.06                                   | 0.05                                   | 0.07                                       |
| Araneae (#mphs SP <sup>-1</sup> )          | −0.07                            |                                     | 0.10                                  | 0.20                                       | 0.12                                         | 0.11                                    | 0.05                               | 0.07                                    | 0.19                                   | 0.10                                       |
| Opiliones (#mphs SP <sup>-1</sup> )        | −0.06                            | 0.10                                |                                       | −0.03                                      | <b>−0.26*</b>                                | 0.09                                    | −0.03                              | −0.05                                   | −0.05                                  | −0.07                                      |
| <b>Chilopoda</b>                           |                                  |                                     |                                       |                                            |                                              |                                         |                                    |                                         |                                        |                                            |
| Geophilomorpha (#mphs SP <sup>-1</sup> )   | 0.12                             | 0.20                                | −0.03                                 |                                            | <−0.01                                       | <b>0.36**</b>                           | −0.01                              | −0.02                                   | −0.02                                  | −0.03                                      |
| <b>Collembola</b>                          |                                  |                                     |                                       |                                            |                                              |                                         |                                    |                                         |                                        |                                            |
| Entomobryomorpha (#mphs SP <sup>-1</sup> ) | 0.07                             | 0.12                                | <b>−0.26*</b>                         | <−0.01                                     |                                              | <b>−0.28*</b>                           | <−0.01                             | 0.10                                    | −0.14                                  | <b>−0.26*</b>                              |
| Symphyleona (#mphs SP <sup>-1</sup> )      | 0.18                             | 0.11                                | 0.09                                  | <b>0.36**</b>                              | <b>−0.28*</b>                                |                                         | −0.04                              | −0.06                                   | 0.22                                   | 0.10                                       |
| <b>Diplopoda</b>                           |                                  |                                     |                                       |                                            |                                              |                                         |                                    |                                         |                                        |                                            |
| Julida (#mphs SP <sup>-1</sup> )           | 0.04                             | 0.05                                | −0.03                                 | −0.01                                      | <−0.01                                       | −0.04                                   |                                    | −0.02                                   | −0.02                                  | −0.03                                      |
| Polydesmida (#mphs SP <sup>-1</sup> )      | −0.06                            | 0.07                                | −0.05                                 | −0.02                                      | 0.10                                         | −0.06                                   | −0.02                              |                                         | −0.03                                  | −0.04                                      |
| <b>Gastropoda</b>                          |                                  |                                     |                                       |                                            |                                              |                                         |                                    |                                         |                                        |                                            |
| Limnophila (#mphs SP <sup>-1</sup> )       | 0.05                             | 0.19                                | −0.05                                 | −0.02                                      | −0.14                                        | 0.22                                    | −0.02                              | −0.03                                   |                                        | <b>0.68***</b>                             |
| Mesogastropoda (#mphs SP <sup>-1</sup> )   | 0.07                             | 0.10                                | −0.07                                 | −0.03                                      | <b>−0.26*</b>                                | 0.10                                    | −0.03                              | −0.04                                   | <b>0.68***</b>                         |                                            |

#ind = number of individuals, SP = sampling point, bold = indicates statistically significant value, \*P &lt; 0.05, \*\*P ≤ 0.001, \*\*\*P ≤ 0.0001.

|                                       | Arachnida                        |                                     |                                       | Chilopoda                                  | Collembola                                   |                                         | Diplopoda                          |                                         | Gastropoda                             |                                            |
|---------------------------------------|----------------------------------|-------------------------------------|---------------------------------------|--------------------------------------------|----------------------------------------------|-----------------------------------------|------------------------------------|-----------------------------------------|----------------------------------------|--------------------------------------------|
|                                       | Acar<br>(#ind SP <sup>-1</sup> ) | Araneae<br>(#ind SP <sup>-1</sup> ) | Opiliones<br>(#ind SP <sup>-1</sup> ) | Geophilomorpha<br>(#ind SP <sup>-1</sup> ) | Entomobryomorpha<br>(#ind SP <sup>-1</sup> ) | Symphyleona<br>(#ind SP <sup>-1</sup> ) | Julida<br>(#ind SP <sup>-1</sup> ) | Polydesmida<br>(#ind SP <sup>-1</sup> ) | Limnophila<br>(#ind SP <sup>-1</sup> ) | Mesogastropoda<br>(#ind SP <sup>-1</sup> ) |
| <b>Insecta</b>                        |                                  |                                     |                                       |                                            |                                              |                                         |                                    |                                         |                                        |                                            |
| Blattodea (#ind SP <sup>-1</sup> )    | −0.08                            | −0.20                               | 0.04                                  | −0.05                                      | −0.16                                        | 0.14                                    | −0.05                              | −0.07                                   | −0.07                                  | −0.10                                      |
| Coleoptera (#ind SP <sup>-1</sup> )   | 0.07                             | <b>0.49***</b>                      | 0.02                                  | 0.15                                       | <1e <sup>-3</sup>                            | 0.04                                    | −0.10                              | 0.17                                    | −0.14                                  | −0.11                                      |
| Dermaptera (#ind SP <sup>-1</sup> )   | <b>0.33**</b>                    | 0.06                                | −0.16                                 | −0.07                                      | <b>0.40***</b>                               | −0.20                                   | 0.16                               | −0.10                                   | −0.10                                  | −0.14                                      |
| Diptera (#ind SP <sup>-1</sup> )      | 0.09                             | −0.08                               | <b>0.28*</b>                          | −0.06                                      | −0.05                                        | 0.16                                    | −0.06                              | −0.08                                   | −0.08                                  | 0.03                                       |
| Hemiptera (#ind SP <sup>-1</sup> )    | 0.04                             | 0.11                                | −0.12                                 | <b>0.27*</b>                               | <b>−0.26*</b>                                | 0.23                                    | −0.05                              | −0.07                                   | −0.07                                  | 0.06                                       |
| Hymenoptera (#ind SP <sup>-1</sup> )  | −0.18                            | <b>0.32**</b>                       | 0.11                                  | 0.15                                       | −0.08                                        | 0.19                                    | −0.08                              | 0.08                                    | 0.05                                   | −0.03                                      |
| Isoptera (#ind SP <sup>-1</sup> )     | 0.03                             | 0.13                                | −0.05                                 | −0.02                                      | −0.01                                        | 0.19                                    | −0.02                              | −0.03                                   | −0.03                                  | −0.04                                      |
| Lepidoptera (#ind SP <sup>-1</sup> )  | −0.15                            | <b>0.24*</b>                        | −0.10                                 | −0.04                                      | 0.14                                         | 0<0.1                                   | −0.04                              | −0.06                                   | −0.06                                  | −0.09                                      |
| Orthoptera (#ind SP <sup>-1</sup> )   | −0.17                            | <−0.01                              | 0.09                                  | 0.14                                       | −0.15                                        | 0.13                                    | 0.14                               | 0.04                                    | −0.12                                  | −0.17                                      |
| Siphonaptera (#ind SP <sup>-1</sup> ) | −0.13                            | 0.20                                | <b>0.46***</b>                        | −0.01                                      | −0.15                                        | −0.04                                   | −0.01                              | −0.02                                   | −0.02                                  | −0.03                                      |

#ind = number of individuals, SP = sampling point, bold = indicates statistically significant value, \*P &lt; 0.05, \*\*P ≤ 0.001, \*\*\*P ≤ 0.0001.

|                                            | Insecta                               |                                        |                                        |                                     |                                       |                                         |                                      |                                         |                                        |                                          |
|--------------------------------------------|---------------------------------------|----------------------------------------|----------------------------------------|-------------------------------------|---------------------------------------|-----------------------------------------|--------------------------------------|-----------------------------------------|----------------------------------------|------------------------------------------|
|                                            | Blattodea<br>(#ind SP <sup>-1</sup> ) | Coleoptera<br>(#ind SP <sup>-1</sup> ) | Dermaptera<br>(#ind SP <sup>-1</sup> ) | Diptera<br>(#ind SP <sup>-1</sup> ) | Hemiptera<br>(#ind SP <sup>-1</sup> ) | Hymenoptera<br>(#ind SP <sup>-1</sup> ) | Isoptera<br>(#ind SP <sup>-1</sup> ) | Lepidoptera<br>(#ind SP <sup>-1</sup> ) | Orthoptera<br>(#ind SP <sup>-1</sup> ) | Siphonaptera<br>(#ind SP <sup>-1</sup> ) |
| <b>Arachnida</b>                           |                                       |                                        |                                        |                                     |                                       |                                         |                                      |                                         |                                        |                                          |
| Acar (#mphs SP <sup>-1</sup> )             | −0.08                                 | 0.07                                   | <b>0.33**</b>                          | 0.09                                | 0.04                                  | −0.18                                   | 0.03                                 | −0.15                                   | −0.17                                  | −0.13                                    |
| Araneae (#mphs SP <sup>-1</sup> )          | −0.20                                 | <b>0.49***</b>                         | 0.06                                   | −0.08                               | 0.11                                  | <b>0.32**</b>                           | 0.13                                 | <b>0.24*</b>                            | <−0.01                                 | 0.20                                     |
| Opiliones (#mphs SP <sup>-1</sup> )        | 0.04                                  | 0.02                                   | −0.16                                  | <b>0.28*</b>                        | −0.12                                 | 0.11                                    | −0.05                                | −0.10                                   | 0.09                                   | <b>0.46***</b>                           |
| <b>Chilopoda</b>                           |                                       |                                        |                                        |                                     |                                       |                                         |                                      |                                         |                                        |                                          |
| Geophilomorpha (#mphs SP <sup>-1</sup> )   | −0.05                                 | 0.15                                   | −0.07                                  | −0.06                               | <b>0.27*</b>                          | 0.15                                    | −0.02                                | −0.04                                   | 0.14                                   | −0.01                                    |
| <b>Collembola</b>                          |                                       |                                        |                                        |                                     |                                       |                                         |                                      |                                         |                                        |                                          |
| Entomobryomorpha (#mphs SP <sup>-1</sup> ) | −0.16                                 | <5e <sup>-4</sup>                      | <b>0.40***</b>                         | −0.05                               | <b>−0.26*</b>                         | −0.08                                   | −0.01                                | 0.14                                    | −0.15                                  | −0.15                                    |



|                                          |       |       |       |       |       |       |       |       |       |       |
|------------------------------------------|-------|-------|-------|-------|-------|-------|-------|-------|-------|-------|
| Symphypleona (#mphs SP <sup>-1</sup> )   | 0.14  | 0.04  | −0.20 | 0.16  | 0.23  | 0.19  | 0.19  | <0.01 | 0.13  | −0.04 |
| <b>Diplopoda</b>                         |       |       |       |       |       |       |       |       |       |       |
| Julida (#mphs SP <sup>-1</sup> )         | −0.05 | −0.10 | 0.16  | −0.06 | −0.05 | −0.08 | −0.02 | −0.04 | 0.14  | −0.01 |
| Polydesmida (#mphs SP <sup>-1</sup> )    | −0.07 | 0.17  | −0.10 | −0.08 | −0.07 | 0.08  | −0.03 | −0.06 | 0.04  | −0.02 |
| <b>Gastropoda</b>                        |       |       |       |       |       |       |       |       |       |       |
| Limnophila (#mphs SP <sup>-1</sup> )     | −0.07 | −0.14 | −0.10 | −0.08 | −0.07 | 0.05  | −0.03 | −0.06 | −0.12 | −0.02 |
| Mesogastropoda (#mphs SP <sup>-1</sup> ) | −0.10 | −0.11 | −0.14 | 0.03  | 0.06  | −0.03 | −0.04 | −0.09 | −0.17 | −0.03 |

#ind = number of individuals, SP = sampling point, bold = indicates statistically significant value, \*P < 0.05, \*\*P ≤ 0.001, \*\*\*P ≤ 0.0001.

| <b>Insecta</b>                        |                                              |                                               |                                               |                                            |                                              |                                                |                                             |                                                |                                               |                                                 |
|---------------------------------------|----------------------------------------------|-----------------------------------------------|-----------------------------------------------|--------------------------------------------|----------------------------------------------|------------------------------------------------|---------------------------------------------|------------------------------------------------|-----------------------------------------------|-------------------------------------------------|
|                                       | <b>Blattodea</b><br>(#ind SP <sup>-1</sup> ) | <b>Coleoptera</b><br>(#ind SP <sup>-1</sup> ) | <b>Dermaptera</b><br>(#ind SP <sup>-1</sup> ) | <b>Diptera</b><br>(#ind SP <sup>-1</sup> ) | <b>Hemiptera</b><br>(#ind SP <sup>-1</sup> ) | <b>Hymenoptera</b><br>(#ind SP <sup>-1</sup> ) | <b>Isoptera</b><br>(#ind SP <sup>-1</sup> ) | <b>Lepidoptera</b><br>(#ind SP <sup>-1</sup> ) | <b>Orthoptera</b><br>(#ind SP <sup>-1</sup> ) | <b>Siphonaptera</b><br>(#ind SP <sup>-1</sup> ) |
| <b>Insecta</b>                        |                                              |                                               |                                               |                                            |                                              |                                                |                                             |                                                |                                               |                                                 |
| Blattodea (#ind SP <sup>-1</sup> )    |                                              | 0.02                                          | −0.14                                         | 0.10                                       | 0.17                                         | <b>0.32**</b>                                  | 0.17                                        | <b>0.23*</b>                                   | <b>0.35**</b>                                 | −0.05                                           |
| Coleoptera (#ind SP <sup>-1</sup> )   | 0.02                                         |                                               | −0.02                                         | −0.09                                      | <b>0.27*</b>                                 | 0.12                                           | 0.12                                        | 0.10                                           | −0.07                                         | 0.15                                            |
| Dermaptera (#ind SP <sup>-1</sup> )   | −0.14                                        | −0.02                                         |                                               | −0.06                                      | −0.17                                        | −0.21                                          | −0.10                                       | −0.02                                          | −0.13                                         | −0.07                                           |
| Diptera (#ind SP <sup>-1</sup> )      | 0.10                                         | −0.09                                         | −0.06                                         |                                            | −0.12                                        | −0.04                                          | 0.12                                        | −0.06                                          | −0.10                                         | −0.06                                           |
| Hemiptera (#ind SP <sup>-1</sup> )    | 0.17                                         | <b>0.27*</b>                                  | −0.17                                         | −0.12                                      |                                              | 0.18                                           | 0.19                                        | 0.10                                           | 0.09                                          | −0.05                                           |
| Hymenoptera (#ind SP <sup>-1</sup> )  | <b>0.32**</b>                                | 0.12                                          | −0.21                                         | −0.04                                      | 0.18                                         |                                                | 0.18                                        | <b>0.41***</b>                                 | <b>0.46***</b>                                | −0.03                                           |
| Isoptera (#ind SP <sup>-1</sup> )     | 0.17                                         | 0.12                                          | −0.10                                         | 0.12                                       | 0.19                                         | 0.18                                           |                                             | <b>0.24*</b>                                   | 0.04                                          | −0.02                                           |
| Lepidoptera (#ind SP <sup>-1</sup> )  | <b>0.23*</b>                                 | 0.10                                          | −0.02                                         | −0.06                                      | 0.10                                         | <b>0.41***</b>                                 | <b>0.24*</b>                                |                                                | 0.12                                          | −0.04                                           |
| Orthoptera (#ind SP <sup>-1</sup> )   | <b>0.35**</b>                                | −0.07                                         | −0.13                                         | −0.10                                      | 0.09                                         | <b>0.46***</b>                                 | 0.04                                        | 0.12                                           |                                               | −0.08                                           |
| Siphonaptera (#ind SP <sup>-1</sup> ) | −0.05                                        | 0.15                                          | −0.07                                         | −0.06                                      | −0.05                                        | −0.03                                          | −0.02                                       | −0.04                                          | −0.08                                         |                                                 |

#ind = number of individuals, SP = sampling point, bold = indicates statistically significant value, \*P < 0.05, \*\*P ≤ 0.001, \*\*\*P ≤ 0.0001.

**Table S8.** Correlation between number of morphospecies per sampling point (#mphs.SP<sup>-1</sup>) per orders of above ground invertebrates ( $n = 72$ ).  $n$  = number of sampling points for statistical analysis.

|                                             | Arachnida                           |                                       |                                         | Chilopoda                                    | Collembola                                     |                                           | Diplopoda                            |                                           | Gastropoda                               |                                              |
|---------------------------------------------|-------------------------------------|---------------------------------------|-----------------------------------------|----------------------------------------------|------------------------------------------------|-------------------------------------------|--------------------------------------|-------------------------------------------|------------------------------------------|----------------------------------------------|
|                                             | Acari<br>(#mphps SP <sup>-1</sup> ) | Araneae<br>(#mphps SP <sup>-1</sup> ) | Opiliones<br>(#mphps SP <sup>-1</sup> ) | Geophilomorpha<br>(#mphps SP <sup>-1</sup> ) | Entomobryomorpha<br>(#mphps SP <sup>-1</sup> ) | Symphyleona<br>(#mphps SP <sup>-1</sup> ) | Julida<br>(#mphps SP <sup>-1</sup> ) | Polydesmida<br>(#mphps SP <sup>-1</sup> ) | Limnophila<br>(#mphps SP <sup>-1</sup> ) | Mesogastropoda<br>(#mphps SP <sup>-1</sup> ) |
| <b>Arachnida</b>                            |                                     |                                       |                                         |                                              |                                                |                                           |                                      |                                           |                                          |                                              |
| Acar (#mphps SP <sup>-1</sup> )             |                                     | -0.02                                 | -0.11                                   | 0.19                                         | 0.00                                           | 0.34**                                    | 0.09                                 | -0.03                                     | 0.11                                     | 0.08                                         |
| Araneae (#mphps SP <sup>-1</sup> )          | -0.02                               |                                       | 0.12                                    | 0.21                                         | 0.00                                           | 0.11                                      | 0.06                                 | 0.07                                      | 0.21                                     | 0.12                                         |
| Opiliones (#mphps SP <sup>-1</sup> )        | -0.11                               | 0.12                                  |                                         | -0.03                                        | <b>-0.28*</b>                                  | 0.07                                      | -0.03                                | -0.05                                     | -0.05                                    | -0.07                                        |
| <b>Chilopoda</b>                            |                                     |                                       |                                         |                                              |                                                |                                           |                                      |                                           |                                          |                                              |
| Geophilomorpha (#mphps SP <sup>-1</sup> )   | 0.19                                | 0.21                                  | -0.03                                   |                                              | -0.01                                          | <b>0.34**</b>                             | -0.01                                | -0.02                                     | -0.02                                    | -0.03                                        |
| <b>Collembola</b>                           |                                     |                                       |                                         |                                              |                                                |                                           |                                      |                                           |                                          |                                              |
| Entomobryomorpha (#mphps SP <sup>-1</sup> ) | 0.00                                | 0.00                                  | <b>-0.28*</b>                           | -0.01                                        |                                                | <b>-0.24*</b>                             | 0.12                                 | 0.13                                      | -0.11                                    | <b>-0.24*</b>                                |
| Symphyleona (#mphps SP <sup>-1</sup> )      | <b>0.34**</b>                       | 0.11                                  | 0.07                                    | <b>0.34**</b>                                | <b>-0.24*</b>                                  |                                           | -0.04                                | -0.06                                     | 0.21                                     | 0.10                                         |
| <b>Diplopoda</b>                            |                                     |                                       |                                         |                                              |                                                |                                           |                                      |                                           |                                          |                                              |
| Julida (#mphps SP <sup>-1</sup> )           | 0.09                                | 0.06                                  | -0.03                                   | -0.01                                        | 0.12                                           | -0.04                                     |                                      | -0.02                                     | -0.02                                    | -0.03                                        |
| Polydesmida (#mphps SP <sup>-1</sup> )      | -0.03                               | 0.07                                  | -0.05                                   | -0.02                                        | 0.13                                           | -0.06                                     | -0.02                                |                                           | -0.03                                    | -0.04                                        |
| <b>Gastropoda</b>                           |                                     |                                       |                                         |                                              |                                                |                                           |                                      |                                           |                                          |                                              |
| Limnophila (#mphps SP <sup>-1</sup> )       | 0.11                                | 0.21                                  | -0.05                                   | -0.02                                        | -0.11                                          | 0.21                                      | -0.02                                | -0.03                                     |                                          | <b>0.68***</b>                               |
| Mesogastropoda (#mphps SP <sup>-1</sup> )   | 0.08                                | 0.12                                  | -0.07                                   | -0.03                                        | <b>-0.24*</b>                                  | 0.10                                      | -0.03                                | -0.04                                     | <b>0.68***</b>                           |                                              |

#mphps = number of morphospecies, SP = sampling point, bold = indicates statistically significant value. \*P < 0.05, \*\*P ≤ 0.001, \*\*\*P ≤ 0.0001.

|           |           |            |           |            |
|-----------|-----------|------------|-----------|------------|
| Arachnida | Chilopoda | Collembola | Diplopoda | Gastropoda |
|-----------|-----------|------------|-----------|------------|

|                                       | Acari<br>(#mphps SP <sup>-1</sup> ) | Araneae<br>(#mphps SP <sup>-1</sup> ) | Opiliones<br>(#mphps SP <sup>-1</sup> ) | Geophilomor-<br>pha<br>(#mphps SP <sup>-1</sup> ) | Entomobry-<br>omorpha<br>(#mphps SP <sup>-1</sup> ) | Symphyleona<br>(#mphps SP <sup>-1</sup> ) | Julida<br>(#mphps SP <sup>-1</sup> ) | Polydesmida<br>(#mphps SP <sup>-1</sup> ) | Linnophila<br>(#mphps SP <sup>-1</sup> ) | Mesogastropoda<br>(#mphps SP <sup>-1</sup> ) |
|---------------------------------------|-------------------------------------|---------------------------------------|-----------------------------------------|---------------------------------------------------|-----------------------------------------------------|-------------------------------------------|--------------------------------------|-------------------------------------------|------------------------------------------|----------------------------------------------|
| <b>Insecta</b>                        |                                     |                                       |                                         |                                                   |                                                     |                                           |                                      |                                           |                                          |                                              |
| Blattodea (#ind SP <sup>-1</sup> )    | -0.03*                              | -0.23                                 | 0.04                                    | -0.05                                             | -0.13                                               | 0.13                                      | -0.05                                | -0.07                                     | -0.07                                    | -0.10                                        |
| Coleoptera (#ind SP <sup>-1</sup> )   | 0.22                                | <b>0.50***</b>                        | <-5e <sup>-3</sup>                      | 0.10                                              | -0.05                                               | 0.03                                      | -0.10                                | 0.20                                      | -0.14                                    | -0.10                                        |
| Dermaptera (#ind SP <sup>-1</sup> )   | 0.13                                | 0.07                                  | -0.16                                   | -0.07                                             | <b>0.29*</b>                                        | -0.20                                     | 0.19                                 | -0.10                                     | -0.10                                    | -0.14                                        |
| Diptera (#ind SP <sup>-1</sup> )      | 0.05                                | -0.06                                 | <b>0.28*</b>                            | -0.06                                             | 0.00                                                | 0.15                                      | -0.06                                | -0.08                                     | -0.08                                    | 0.03                                         |
| Hemiptera (#ind SP <sup>-1</sup> )    | 0.08                                | 0.12                                  | -0.12                                   | <b>0.27*</b>                                      | <b>-0.32**</b>                                      | <b>0.25*</b>                              | -0.05                                | -0.07                                     | -0.07                                    | 0.07                                         |
| Hymenoptera (#ind SP <sup>-1</sup> )  | -0.15                               | <b>0.30*</b>                          | 0.08                                    | 0.15                                              | -0.09                                               | 0.13                                      | -0.14                                | 0.09                                      | 0.14                                     | 0.03                                         |
| Isoptera (#ind SP <sup>-1</sup> )     | 0.06                                | 0.15                                  | -0.05                                   | -0.02                                             | -0.02                                               | 0.21                                      | -0.02                                | -0.03                                     | -0.03                                    | -0.04                                        |
| Lepidoptera (#ind SP <sup>-1</sup> )  | -0.10                               | 0.15                                  | -0.10                                   | -0.04                                             | <b>0.27*</b>                                        | 0.02                                      | -0.04                                | -0.06                                     | -0.06                                    | -0.09                                        |
| Orthoptera (#ind SP <sup>-1</sup> )   | -0.12                               | -0.03                                 | 0.03                                    | 0.16                                              | -0.08                                               | 0.12                                      | 0.16                                 | 0.06                                      | -0.12                                    | -0.17                                        |
| Siphonaptera (#ind SP <sup>-1</sup> ) | -0.13                               | 0.22                                  | 0.46                                    | -0.01                                             | -0.15                                               | -0.04                                     | -0.01                                | -0.02                                     | -0.02                                    | -0.03                                        |

#mphps = number of morphospecies, SP = sampling point, bold = indicates statistically significant value, \*P < 0.05, \*\*P ≤ 0.001, \*\*\*P ≤ 0.0001.

\_\_\_\_\_

[illegible]

|                                            |       |       |              |       |                |       |       |              |       |       |
|--------------------------------------------|-------|-------|--------------|-------|----------------|-------|-------|--------------|-------|-------|
| Entomobryomorpha (#mphs SP <sup>-1</sup> ) | -0.13 | -0.05 | <b>0.29*</b> | 0.00  | <b>-0.32**</b> | -0.09 | -0.02 | <b>0.27*</b> | -0.08 | -0.15 |
| Symphypleona (#mphs SP <sup>-1</sup> )     | 0.13  | 0.03  | -0.20        | 0.15  | <b>0.25*</b>   | 0.13  | 0.21  | 0.02         | 0.12  | -0.04 |
| <b>Diplopoda</b>                           |       |       |              |       |                |       |       |              |       |       |
| Julida (#mphs SP <sup>-1</sup> )           | -0.05 | -0.10 | 0.19         | -0.06 | -0.05          | -0.14 | -0.02 | -0.04        | 0.16  | -0.01 |
| Polydesmida (#mphs SP <sup>-1</sup> )      | -0.07 | 0.20  | -0.10        | -0.08 | -0.07          | 0.09  | -0.03 | -0.06        | 0.06  | -0.02 |
| <b>Gastropoda</b>                          |       |       |              |       |                |       |       |              |       |       |
| Limnophila (#mphs SP <sup>-1</sup> )       | -0.07 | -0.14 | -0.10        | -0.08 | -0.07          | 0.14  | -0.03 | -0.06        | -0.12 | -0.02 |
| Mesogastropoda (#mphs SP <sup>-1</sup> )   | -0.10 | -0.10 | -0.14        | 0.03  | 0.07           | 0.03  | -0.04 | -0.09        | -0.17 | -0.03 |

#mphs = number of morphospecies, SP = smpling point, bold = indicates statistically significant value, \*P < 0.05, \*\*P ≤ 0.001, \*\*\*P ≤ 0.0001.

| <b>Insecta</b>                        |                                               |                                                |                                                |                                             |                                               |                                                 |                                              |                                                 |                                                |                                                  |
|---------------------------------------|-----------------------------------------------|------------------------------------------------|------------------------------------------------|---------------------------------------------|-----------------------------------------------|-------------------------------------------------|----------------------------------------------|-------------------------------------------------|------------------------------------------------|--------------------------------------------------|
|                                       | <b>Blattodea</b><br>(#mphs SP <sup>-1</sup> ) | <b>Coleoptera</b><br>(#mphs SP <sup>-1</sup> ) | <b>Dermaptera</b><br>(#mphs SP <sup>-1</sup> ) | <b>Diptera</b><br>(#mphs SP <sup>-1</sup> ) | <b>Hemiptera</b><br>(#mphs SP <sup>-1</sup> ) | <b>Hymenoptera</b><br>(#mphs SP <sup>-1</sup> ) | <b>Isoptera</b><br>(#mphs SP <sup>-1</sup> ) | <b>Lepidoptera</b><br>(#mphs SP <sup>-1</sup> ) | <b>Orthoptera</b><br>(#mphs SP <sup>-1</sup> ) | <b>Siphonaptera</b><br>(#mphs SP <sup>-1</sup> ) |
| <b>Insecta</b>                        |                                               |                                                |                                                |                                             |                                               |                                                 |                                              |                                                 |                                                |                                                  |
| Blattodea (#ind SP <sup>-1</sup> )    |                                               | -0.01                                          | -0.14                                          | 0.10                                        | 0.15                                          | <b>0.34**</b>                                   | 0.17                                         | <b>0.24*</b>                                    | <b>0.29*</b>                                   | -0.05                                            |
| Coleoptera (#ind SP <sup>-1</sup> )   | -0.01                                         |                                                | -0.05                                          | -0.09                                       | <b>0.29*</b>                                  | 0.21                                            | 0.14                                         | 0.12                                            | -0.04                                          | 0.10                                             |
| Dermaptera (#ind SP <sup>-1</sup> )   | -0.14                                         | -0.05                                          |                                                | -0.04                                       | -0.16                                         | <b>-0.29*</b>                                   | -0.10                                        | 0.02                                            | -0.12                                          | -0.07                                            |
| Diptera (#ind SP <sup>-1</sup> )      | 0.10                                          | -0.09                                          | -0.04                                          |                                             | -0.12                                         | -0.06                                           | 0.12                                         | -0.07                                           | -0.14                                          | -0.06                                            |
| Hemiptera (#ind SP <sup>-1</sup> )    | 0.15                                          | <b>0.29*</b>                                   | -0.16                                          | -0.12                                       |                                               | 0.14                                            | 0.20                                         | 0.11                                            | 0.12                                           | -0.05                                            |
| Hymenoptera (#ind SP <sup>-1</sup> )  | <b>0.34**</b>                                 | 0.21                                           | <b>-0.29*</b>                                  | -0.06                                       | 0.14                                          |                                                 | 0.16                                         | <b>0.29*</b>                                    | <b>0.36**</b>                                  | 0.08                                             |
| Isoptera (#ind SP <sup>-1</sup> )     | 0.17                                          | 0.14                                           | -0.10                                          | 0.12                                        | 0.20                                          | 0.16                                            |                                              | 0.21                                            | 0.06                                           | -0.02                                            |
| Lepidoptera (#ind SP <sup>-1</sup> )  | <b>0.24*</b>                                  | 0.12                                           | 0.02                                           | -0.07                                       | 0.11                                          | <b>0.29*</b>                                    | 0.21                                         |                                                 | 0.12                                           | -0.04                                            |
| Orthoptera (#ind SP <sup>-1</sup> )   | <b>0.29*</b>                                  | -0.04                                          | -0.12                                          | -0.14                                       | 0.12                                          | <b>0.36**</b>                                   | 0.06                                         | 0.12                                            |                                                | -0.08                                            |
| Siphonaptera (#ind SP <sup>-1</sup> ) | -0.05                                         | 0.10                                           | -0.07                                          | -0.06                                       | -0.05                                         | 0.08                                            | -0.02                                        | -0.04                                           | -0.08                                          |                                                  |

#mphs = number of morphospecies, SP = sampling point, bold = indicates statistically significant value, \*P < 0.05, \*\*P ≤ 0.001, \*\*\*P ≤ 0.0001.
